# Supplementary material
Source: publisher figshare collection journal article supplement (https://acs.figshare.com/ndownloader/files/3765547)
Supplement: Supplementary file 1 [file 3765547]

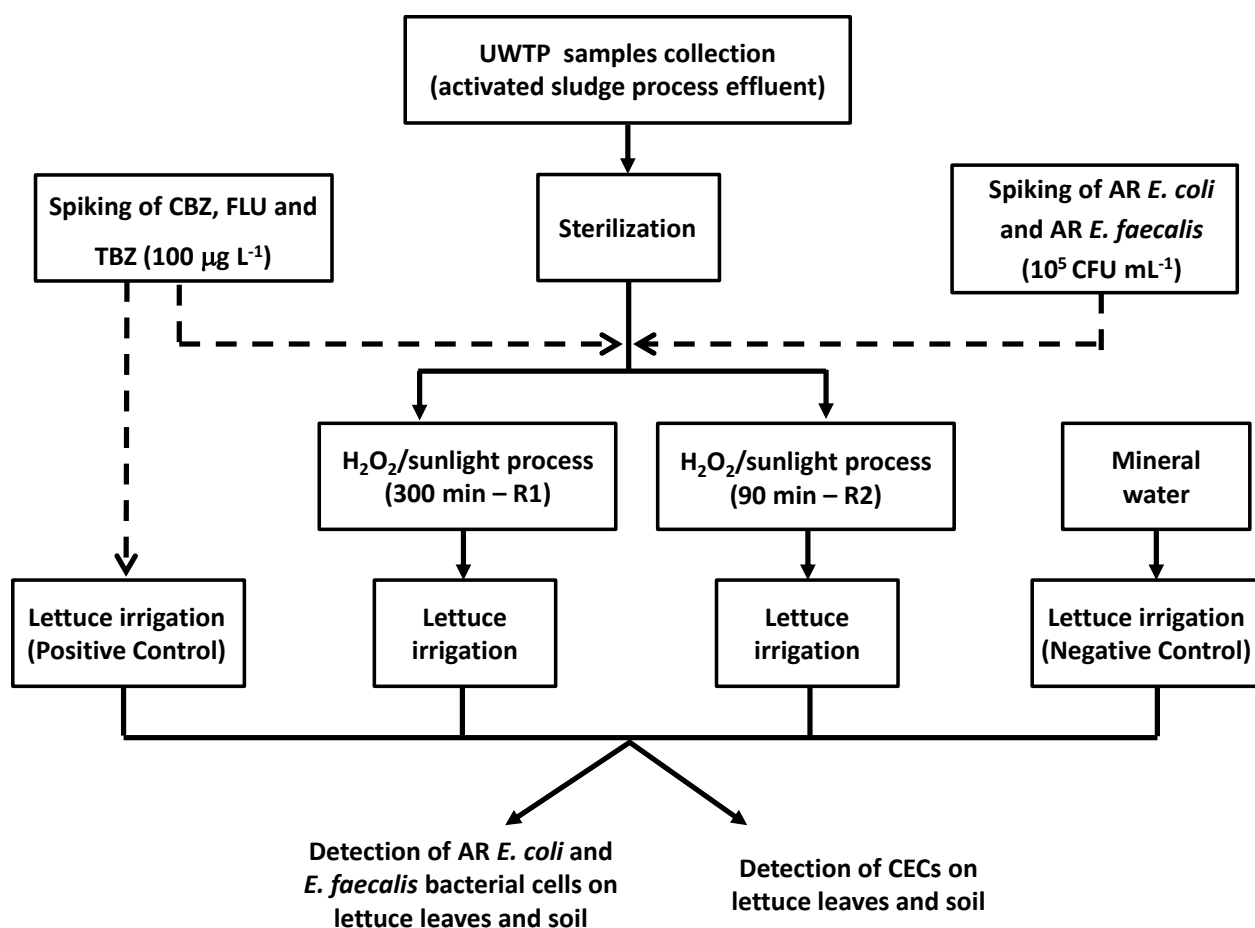

**Figure S1.** Schematic view of experimental design. Acronyms: Carbamazepine (CBZ), flumequine (FLU), thiabendazole (TBZ), antibiotic resistant (AR), urban wastewater treatment plant (UWTP).
